# Predicting functional networks from region connectivity profiles in task-based versus resting-state fMRI data

Javier Rasero<sup>1</sup>, Hannelore Aerts<sup>2</sup>, Jesus M. Cortes<sup>1,3</sup>, Sebastiano Stramaglia<sup>4,5</sup>,  
and Daniele Marinazzo<sup>2</sup>

<sup>1</sup>Biocruces Health Research Institute. Hospital Universitario de Cruces. E-48903, Barakaldo, Spain.

<sup>2</sup>Faculty of Psychology and Educational Sciences, Department of Data Analysis, Ghent University, Henri Dunantlaan 1, B-9000 Ghent, Belgium

<sup>3</sup>Ikerbasque, The Basque Foundation for Science, E-48011, Bilbao, Spain.

<sup>4</sup>Dipartimento di Fisica, Università degli Studi "Aldo Moro" Bari, Italy

<sup>5</sup>Istituto Nazionale di Fisica Nucleare, Sezione di Bari, Italy

February 2, 2018

## Abstract

Intrinsic Connectivity Networks, patterns of correlated activity emerging from "resting-state" Blood Oxygenation Level Dependent time series, are increasingly being associated to cognitive, clinical, and behavioral aspects, and compared with the pattern of activity elicited by specific tasks. In this study we use a large cohort of publicly available data to test to which extent one can associate a brain region to one of these Intrinsic Connectivity Networks looking only at its connectivity pattern, and examine at how the correspondence between resting and task-based patterns can be mapped in this context. By trying a battery of different supervised classifiers relying only on task-based measurements, we show that the highest accuracy is reached with a simple neural network of one hidden layer. In addition, when testing the fitted model on resting state measurements, such architecture yields a performance close to 90% for areas connected to the task performed, which mainly involve the visual and sensorimotor cortex. This clearly confirms the correspondence of Intrinsic Connectivity Networks in both paradigms and opens a window for future clinical applications to subjects whose participation in a required task cannot be guaranteed.

## Abbreviations

ICN-Intrinsic Connectivity Network

BOLD-Blood Oxygenation Level

fMRI-Functional magnetic resonance imaging

VIS-Visual Network

SM-Somatosensory Network

VA-Ventral Attention Network

DA-Dorsal Attention Network

L-Lymbic Network

FP-Fronto-parietal Network

DMN-Default Mode Network

CER-Cerebellar Network

SUB-Subcortical Network

FSL-FMRIB Software Library

FLIRT-FMRIB's Linear Image Registration Tool

FNIRT-FMRIB's Non-Linear Image Registration Tool

HCP-Human Connectome Project

RF-Random Forest

SVM-Support Vector Machines

NN-Neural Network

ROC- Receiver Operating Characteristic

PR - Precision-Recall

TPR-true positive rate

FPR- false positive rate

# 1 Introduction

Functional magnetic resonance imaging (fMRI) has become a powerful tool to study brain dynamics with relatively fine spatial resolution. One popular paradigm, given the indirect and contrast-based nature of the method, is the block design, alternating task with passive rest. Task-associated brain activity can then be inferred by contrasting the level of BOLD signal between task and resting blocks in each voxel.

In a seminal study by Biswal *et al.* [Biswal *et al.*, 1995], it has been shown that spontaneous low frequency fluctuations ( $< 0.1$  Hz) in BOLD signal, present even when subjects are not performing any specific task, give rise to correlated patterns. In particular, after identification of seed regions in the sensorimotor cortex by a bilateral finger tapping task fMRI protocol, the authors found synchronous fluctuations of BOLD time courses between these seed regions and homologous areas in the opposite hemisphere. This finding demonstrated the existence of a sensorimotor network even at resting state. In addition to the sensorimotor network, several other functional networks that are activated in task designed experiments have since been identified during resting state, such as the dorsal and ventral attention networks, and the fronto-parietal control network [Fox *et al.*, 2006, Vincent *et al.*, 2008]. Among these functional networks, the most characteristic and ubiquitous is the default mode network (DMN) [Raichle *et al.*, 2001], including the posterior cingulate cortex, precuneus and medial prefrontal cortex. Regions belonging to this network exhibit a deactivation when cognitive tasks are performed and an increase in activity during rest [Gusnard and Raichle, 2001].

In order to identify these Intrinsic Connectivity Networks (ICNs) emerging from resting-state measurements, the most common methods are seed based analysis and independent component analysis. In seed-based analysis, voxels within a region of interest ("seed region") are selected and their average BOLD time course is correlated with that of all other voxels in the brain. Voxels showing a correlation with the seed region above a certain threshold are then considered to be functionally related to the region of interest. The main disadvantage of this approach, however, is that it requires *a priori* selection of seed regions. Independent component analysis (ICA), in contrast, is a model-free approach, requiring very few assumptions [Beckmann *et al.*, 2005]. This method separates the BOLD time courses of all voxels into different spatial components and ensures maximum statistical independence among them [Damoiseaux *et al.*, 2006]. Since this is a pure data-driven approach, in contrast to the "seed region" scenario, there is no clear link between the components found and the specific brain functions. As a result, component labeling might not be straightforward, especially at the individual subject level. Furthermore, the number of components to be retained is an arbitrary parameter to be provided, that might be fitted by a supplied criterion, such as the minimisation of a cost-sensitive function that allows an optimal match of the similarity reached by ICA predictions with respect to the observed dataset.

ICNs in resting state experimental designs can thus be regarded as regions with similar BOLD signal profiles. Therefore, different clustering methods can also be applied to explore the structure of whole-brain BOLD time series, in an attempt to identify functional networks on the basis of resting-state fMRI data (see [Cordes *et al.*, 2002, Lee *et al.*, 2012, Bellec *et al.*, 2010, van den Heuvel *et al.*, 2008] for the use of different unsupervised clustering methods). In order to solve the component labeling problem, supervised learning approaches can also be utilized, where the identification and prediction of these networks is accomplished after fitting the decision boundaries that separate each class by directly supplying the instance labels. In previous studies, a multilayer perceptron was found to be the optimal method to map the topography of ICNs in healthy young control subjects, after which it was applied to a small sample of patients undergoing surgical treatment for intractable epilepsy or tumor resection [Hacker *et al.*, 2013, Mitchell *et al.*, 2013]. The ability to reliably estimate functional networks from resting-state fMRI data would have important clinical implications, for example in neurosurgeons' pre-surgical planning when patients are unable to cooperate with the task-based paradigm [Lee *et al.*, 2016]. Furthermore, predictions from models uniquely trained on resting state measurements from healthy people have been demonstrated to robustly match activation profiles of pre-surgical populations that usually suffer from a great deal of variability [Jones *et al.*, 2017].

Therefore, the aim of the present work is twofold. Firstly, to replicate and extend previous studies intended to identify ICNs using supervised learning approaches by making use of a larger cohort of subjects. we will explore different classification algorithms and compare their performance in identifying ICNs when subjects are performing a specific task. Secondly, to which extent one can

predict ICNs training in task-based paradigm and predict the ICN structure emerging purely from resting-state fMRI data, using the optimal model as identified with task-based fMRI data. We believe these goals are crucial since they will allow a better generalisation of the feasibility of the approach by enlarging the subject population, support the development of a general framework for ICN identification using supervised machine learning methods, and will confirm the overlap between the structures emerging from both task and resting data.

## 2 Materials and Methods

### 2.1 Subjects

We considered both resting-state and task-based fMRI data from 282 unrelated healthy subjects provided by the s900 release Human Connectome Project (HCP). All images were reconstructed using algorithm r227. This reconstruction algorithm directly performs the separation of the multi-band multi-slice in k-space, in contrast to a previous reconstruction algorithm (r177), where the separation occurred after transforming the fully acquired sampled data to frequency space along the read-out direction.

### 2.2 Data acquisition and preprocessing

Data were acquired on a customized Siemens 3T “Connectome Skyra” scanner, housed at Washington University in St. Louis, using a standard 32-channel Siemens receive head coil and a “body” transmission coil designed by Siemens specifically (Echo Planar Imaging sequence, Gradient-echo EPI, 1200 volumes, TR = 720 ms, echo time = 33.1 ms, flip angle =  $52^\circ$ , voxel size =  $2 \times 2 \times 2\text{mm}^3$ , field of view =  $208 \times 180\text{mm}^2$ , 72 transversal slices).

Resting-state and task-based fMRI data were collected in two sessions. Each session consisted of two resting-state acquisitions of approximately 15 minutes each, where subjects were instructed to keep their eyes open, followed by task-based fMRI acquisitions of varying durations. For this study, we used the resting-state fMRI data acquired with Left-Right orientation from the first session, and task-based fMRI data with the MOTOR paradigm. In this task, participants were presented with visual cues that ask them to either tap their left or right finger, squeeze their left or right toe, or move their tongue. Each task volume image was obtained from 10 blocks of 12 seconds each, corresponding to 2 tongue movements, 4 hand movements (2 right and 2 left), 4 foot movements (2 right and 2 left), and 3 fixation blocks of 15 seconds. Each block was also preceded by a 3-second cue.

For this study, we used the preprocessed resting-state fMRI data as provided by HCP. In particular, the ICA-FIX pipeline [Glasser et al., 2013, Salimi-Khorshidi et al., 2014] was applied, which cleans the BOLD signal by removing noise components given by the ICA algorithm and that has been proved to increase the quality of the original data. In the case of task data, such a denoised version was not yet available. Therefore, we downloaded the minimally preprocessed data and ICA-FIX processed it through the *hcp\_fix* script that can be found in the HCP repository. This script performs a rigid-body head motion correction, high-pass temporal filtering, ICA decomposition of the data, FIX identification of the ICA components corresponding to artifacts and elimination of these components from the original data. Furthermore, we used FSL’s FNIRT command *applywarp* to transform both paradigm data from MNI space back to subjects’ native space through the appropriate matrix transformation that can be found for each subject in the HCP repository and FSL’s FLIRT to resample the native structural image at 2mm.

Next, the Shen parcellation atlas was transformed to subjects’ native space, partitioning each subject’s brain in 268 functionally homogeneous and spatially coherent brain regions [Shen et al., 2013]. Functional connectivity matrices for each subject were then obtained by computing the Pearson correlation between the mean BOLD time course among all pairs of the 268 brain regions. A row (column)  $i$  of a given matrix thus represents the correlation image of the  $i^{\text{th}}$  ROI with all other brain regions. Hence, these correlation images describe the interactions of a brain node, which make up the intrinsic connectivity networks (ICNs). Specifically, we considered seven cortical ICNs as proposed by Yeo and colleagues [Yeo et al., 2011] (visual (VIS), sensorimotor (SM), dorsal attention (DA), ventral attention (VA), limbic (L), fronto-parietal (FP), and default mode network (DMN)), and two more sub-networks for the sake of completeness, comprising subcortical (SUB)

and cerebellar regions (CER). The number of regions per network in this atlas is 30, 25, 18, 22, 22, 23, 42, 48 and 38 respectively.

Finally, the 282 resulting individual FC matrices were concatenated together to obtain a super-matrix  $282 \text{ (subjects)} \times 268 \text{ correlation images (features)}$  to feed the machine learning algorithms used in the subsequent analysis<sup>1</sup>.

### 2.3 Machine Learning analysis

Each correlation image was used to identify ICNs by means of three well known classification algorithms in machine learning: a Support Vector Machine (SVM) and Random Forest (RF) run under scikit-learn 0.18, an open source Python library that implements a wide range of machine learning tools which include preprocessing, cross-validation and classification algorithms [et al., 2011]; and a multilayer Neural Network (NN) using Keras in a Theano backend, an API for deep learning written in Python that allows for a robust and easy implementation of high-level neural networks (in our case) [Chollet et al., 2015].

SVM is a maximum-margin classifier, aiming to find a hyperplane that maximizes the distance to the nearest points on each side representing each class (the so-called support vectors). It is specially suited for high dimensional problems, since it can linearly separate any dataset by going to a high dimensional space with the aid of a kernel function. For our analysis we used a linear kernel.

RF, on the other hand, is an ensemble of decision trees, which split the feature space according to the maximization of the Gini criterion, where each decision tree is trained on a random subset of examples and each splitting considers only a random subset of features, so that uncorrelated trees are obtained. By doing so, and averaging over all trees, one can reduce the variance and therefore avoid overfitting. For this study, 500 trees were considered.

Multilayer neural networks are able to fit a nonlinear function by passing the examples through its architecture while minimizing a loss function. The basic setup is a first layer with units equal to the number of features, a (few) hidden layer(s) and a final output layer that encodes the label information. The training is performed by updating the links (weights) among layers by back propagation in order to reduce the output error. We have explored several network architectures varying both depth and number of units per layer. Each layer has a *ReLU* activation except for the last one defining the example class which is a *Softmax* function. We used a Stochastic gradient descent optimizer with a learning rate of 0.01, a decay of  $10^{-6}$  and a Nesterov momentum of 0.9. Likewise, in order to prevent overfitting we adopted an early stopping criterion on a %10 of the training dataset and a dropout rate of 0.2, which randomly sets this fraction rate of input units to 0 at each update during training time.

While MLP and RF can inherently map correlation images into a 9-dimensional space, such an implementation is not as straightforward in SVM which is more suitable for binary classification. In order to address this issue, a common approach is to use a one-versus-all strategy, where one builds as many classifiers as class labels and trains each one taking one label as positive versus the rest being negative cases. Finally, classification of a test example is made by reporting the highest confidence score predicted after applying all classifiers.

We also applied such one-versus-all strategy to RF so that one can isolate the features which contribute most to the splitting in each classifier. Furthermore, when adopting the mentioned strategy, it is also important to take into account that the dataset will be unbalanced when building each classifier, so we have solved this by making both SVM and RF cost-sensitive, so that training an example from the majority class costs more than one of the minority class, weighted by the proportion of examples in both classes.

The best model amongst all tried was selected by comparing their global performance in a 5-fold cross-validation scheme. Consequently, we randomly shuffled 5 times the whole  $282 \times 268$  dataset and considered the first 80% of the data as training and the remaining as test data in each iteration. Performance was assessed as the mean of the ratios of predicted examples well classified with respect to the known labels in the test set across all iterations.

We first obtained the best model by training and testing several algorithms using exclusively task data and second, the same model with the entire task fMRI as **training set** was then used to make predictions relying on resting fMRI data as **test set**. As such, one could infer whether

---

<sup>1</sup>In order to avoid any future bias, we subtracted self-connections on the main diagonal.

intrinsic connectivity networks from a model fitted exclusively on task data could be recovered even when the subject is not capable of performing the task.

Results are reported in several ways: (1) global accuracy (*i.e.* proportion of correctly classified instances); (2) a confusion matrix, where each row represents the instances in a predicted class and each column the examples in an actual class; (3) and ROC and Precision-Recall curves which exhibit model behaviour affected by different thresholds on the decision function predicted for each class. ROC curves represent the true positive (TPR) versus false positive rate (FPR), where in binary classification  $TPR = TP/P = \#(\text{pred}==\text{pos} \mid \text{pos})/(\# \text{pos})$  and  $FPR = FP/N = \#(\text{pred}==\text{pos} \mid \text{neg})/(\# \text{neg})$ , where  $\#$  indicates number of examples. *Precision* is defined as the ratio of positive predictions that are indeed positive and *Recall* as the proportion of positive instances that are classified so.

## 3 Results

### 3.1 Performance on task fMRI

Global accuracy obtained by the different methods described in the previous section can be seen in table 1 (Random Forest and Support Vector Machine) and Figure 1 (Neural Network models with different depth and units per layer).

| Classifier          | Accuracy (mean $\pm$ std) |
|---------------------|---------------------------|
| Linear SVM          | 61.12 $\pm$ 0.16          |
| RF                  | 67.06 $\pm$ 0.17          |
| RF (one-versus-all) | 71.40 $\pm$ 0.33          |

Table 1: Averaged classification accuracy in a 5-fold cross-validation scheme for Random Forest and Support Vector Machine models.

First, we can see that neural network models outperform both Support Vector Machine and Random Forest algorithms, popular choices in literature when dealing with machine learning problems. Within the neural network models, there seems to be a tendency of worse performance as the neural network becomes deeper, whereas the number of units provides higher error bars, probably as a consequence of suffering from more over-fitting. In sum, the best model found corresponds to a neural network with one hidden layer of 500 units that yields a global accuracy of 87%. In the following, we will concentrate on the results given by this model.

Since we are dealing with a multi-class problem, it is important to calculate the classification performance of each ICN. This can be accomplished by means of the confusion matrix, that is depicted in Figure 2 for our best model. As one can see, all ICNs exhibit a good performance, specially for the visual, somatosensory-motor, dorsal attention and default mode network where rates above 90% are achieved. The Limbic system however stands out of this behaviour, since its accuracy drops to approximately 72%, with a notorious 20% of examples misclassified as subcortical regions.

This difference in performance by each ICN might be addressed by looking at the similarity among them in more detail. In Figure 3, we show the Pearson cross-correlation matrix between pattern connectivities of the 268 nodes from the subjects-averaged connectivity matrix on the left, whereas on the right we depict the dispersion of the off-diagonal terms within each class (the bold boxes on the correlation matrix) in order to account for the intra-group similarity specifically. As can be noticed, examples from the limbic and subcortical networks are more distant to each other, leading to an increase of similarity variance, which explains why the classifier struggles to build a decision function that distinguishes them efficiently. Likewise, yet having smaller intra-group similarity, DMN network examples are classified better in contrast to those of FP, probably as a consequence of a smaller inter-group distance as reflected in the correlation matrix.

### 3.2 Generalisation to resting-state fMRI data

Next, we investigated how well the best neural network model generalised the results found so far when testing is performed on resting-state fMRI data from a model which was **only** trained

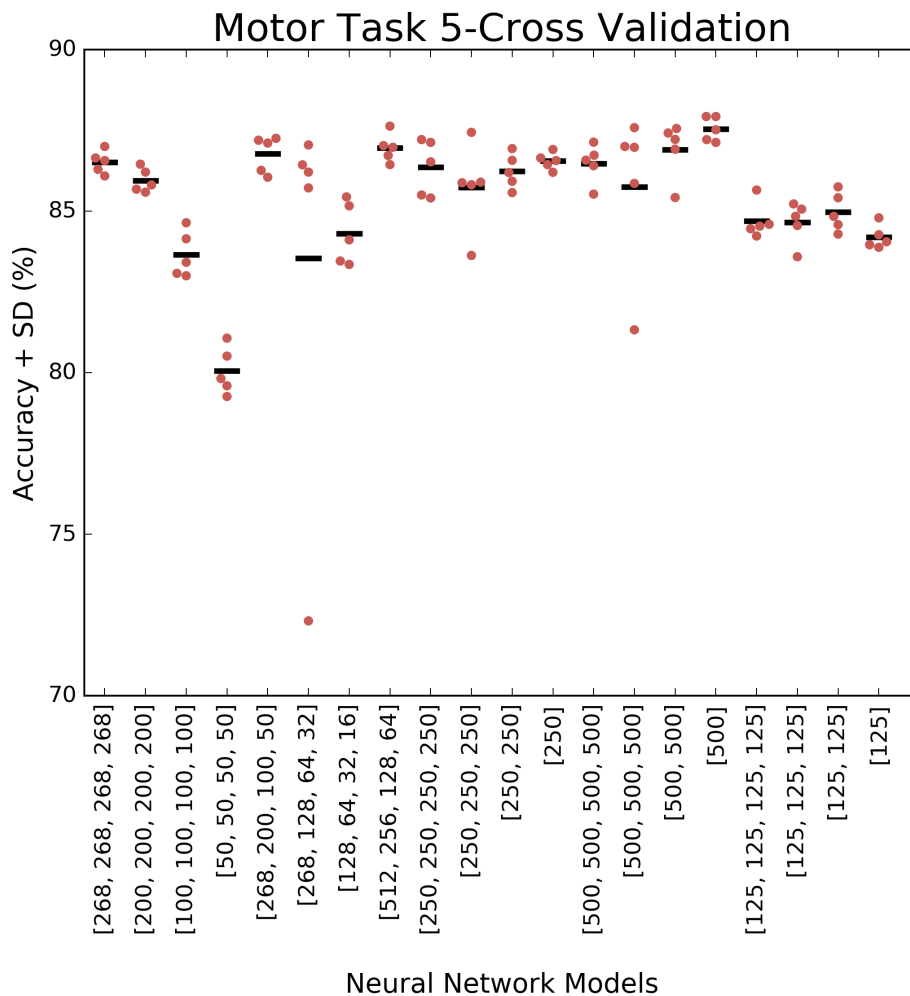

Figure 1: Averaged global accuracy in a 5-fold cross-validation scheme for a set of neural network models with varying depth (length of the array in brackets in x-axis) and intermediate units (number within each component of the array in brackets in the x-axis).

using task-based data. In other words, we examined whether intrinsic connectivity networks can be successfully predicted in experiments where no active collaboration of the subjects is required.

Figure 4 shows the confusion matrix after re-fitting, using the whole task-based fMRI dataset for model training and testing on resting-state fMRI data. Results demonstrate that the prominence of systems involved in the response to the stimuli triggered by the task protocol leads to high prediction rates in both VIS and SM network, with approximately 92% and 88% of sensitivity (also known as recall) respectively. Similarly, quick visual identification within the studied task to conditionally perform a specific movement encodes a bottom-up process which demands activation of ventral attention areas. Such areas are also well predicted by our fitted model with a 82% sensitivity. In contrast, dorsal attention areas attached to top-down stimuli drastically decrease their performance to 70%, with a noticeable proportion being misclassified into the visual network, possibly reflecting some characteristic of the task paradigm in study. On the other hand, DMN regions whose activity negatively correlates with that of the other networks during rest exhibit also a remarkable performance of about 80%, which suggests that these areas maintain an intrinsic correlation that allows them to be optimally fitted by a model even during task. Finally, Limbic and Cerebellum systems involved in learning, memory and behaviour suffer from variability and hence are poorly replicated by our model.

The results obtained so far predict one *and only one* class for each instance, corresponding to the class assigned with the highest probability. Instead, we can directly look into this class probability prediction for each example and see how the model performs when changing the threshold of class

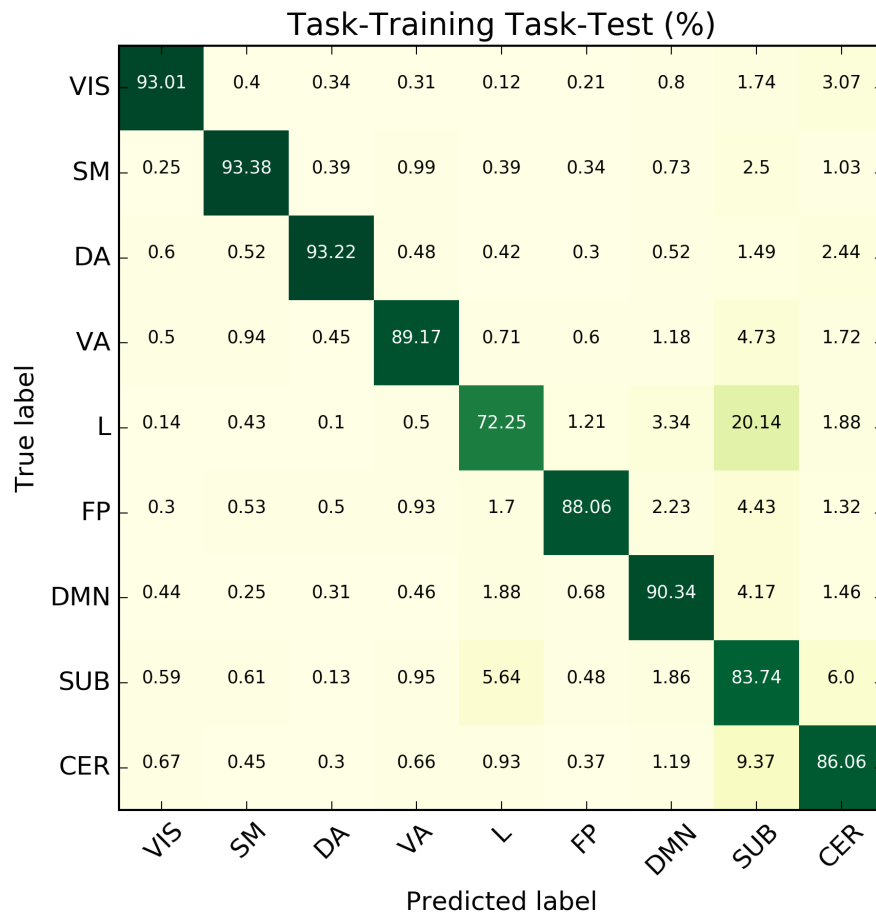

Figure 2: Confusion matrix for the best classification problem, which in this case corresponds to a NN with one hidden layer with 500 units

assignment. We show this in Figure 5 and 6 through the ROC curves and the Precision-Recall curves. Furthermore, on the curves we show with a cross the point that corresponds to assigning the class instance to the label with the largest probability, a scenario which yields the results reported previously. We can see that in general, most of the networks have large PR areas, close to 0.90, where SM and VIS areas stand out with greater values. In addition, VIS, VA, FP and DMN network configurations denoted by the cross point lie in the most optimal position on the curves where the trade-off between horizontal and vertical measures is balanced. Had we solely relied on results provided by the confusion matrix of figure 4, we would not have appreciated that SM network’s precision does not reach the large values of the sensitivity and VA attention regions, whose recall was considered poor, show precision rates close to the largest performance. In this sense, the scenario established by the model is not the most optimal with regard to these mentioned networks.

Finally, it is reasonable to assume that performance from correlation images for the different regions differ according to their brain space location. In order to assess this issue, we show the classification rate of each region across all 282 subjects in Figure 7. This figure shows that, for instance, regions in the cerebellum display rather polarised results. Areas strictly in the right hemisphere within the posterior of the Crus Cerebellum I/II and lobes VI, VIIb and VIII have a successful accuracy greater than 80%, whereas anterior areas, lobes in the left hemisphere along with the vermis exhibit poorer performance than chance, being mainly mislabelled as subcortical regions. Cerebellum takes part in motor and attention tasks, where there is for example a clear asymmetry in the foot, hand, and tongue movement activation maps for intrinsic functional connectivity (left hemisphere) and task functional connectivity(right hemisphere) [Buckner, 2013]. On the other hand, since it mainly deals with emotional and long-term cognitive functions, Limbic



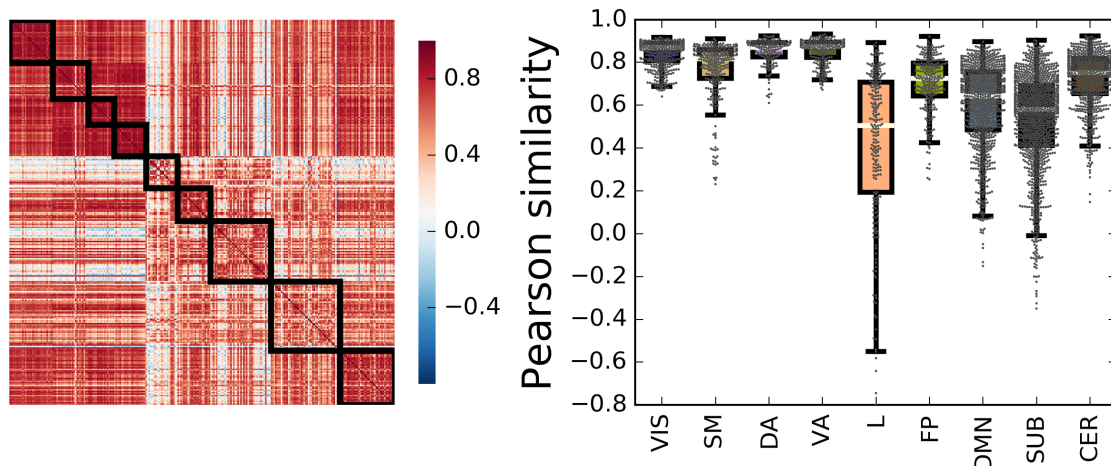

Figure 3: Representation of correlations amongst the 268 pattern connectivities from the subjects-averaged connectivity matrix. On the left, the full correlation matrix, ordered according to their group label, whose members' interactions are outlined by a bold rectangle. On the right, the intra-group correlation distribution corresponding to the upper off-diagonal entries in each bold rectangle.

network is *a priori* the most detached system in relation with the studied task. Nonetheless, limbic regions located in the inferior and middle temporal gyrus and pole have decent classifying power, specially in the left hemisphere, whereas accuracy in orbital parts of the left frontal gyrus and rectus drastically drops below 50%. In addition, default mode network and fronto-parietal regions, which both yield a decent performance, exhibit interesting features. In general, they both have regions well above 90%, with higher incidence on the middle and posterior cingulum in both hemispheres and the left precentral and middle frontal gyrus, and poorly classifying parts depicted in yellow that correspond to the frontal gyrus orbital part, the olfactory cortex, rectus, hippocampus, calcarine and precuneus in the left hemisphere for default mode networks nodes; and the anterior and middle cingulum for both networks.

## 4 Discussion

We have shown that the whole-brain functional connectivity patterns obtained from the Pearson correlation matrices from a large population of healthy subjects allow us to fit different models and successfully predict the organization in Intrinsic Connectivity Networks. We have tested several models and obtained the highest accuracy with a neural network of one hidden layer and 500 intermediate units. Given the models trained, this result suggests that the complexity of the problem is not high enough to demand a deeper architecture by adding more layers. Had we considered a representation at the voxel level, this situation would have likely changed due to the increase of dimensionality, and more complex models would have likely been required. Moreover, well-established algorithms such as Random Forest (RF) and Support Vector Machines (SVM) were not capable of reaching a performance similar to the one obtained by neural networks. Two hypotheses might be formulated to explain this phenomenon. First, RF splits the space taking a subset of features, so this model fails to capture the optimal splitting out of the correlation images since one would expect the whole pattern to be important. Second, both SVM and RF in general find it more challenging to build the boundary decision in high dimensional multi-class settings.

Following the findings in a previous work [Smith et al., 2009], it is remarkable how accurate intrinsic connectivity networks can be identified using only task data, which reflects the high degree of correspondence between both modalities. Not only could visual and sensorimotor regions be clearly represented by both paradigms, as expected, but also other functional networks turned out to have correlation images which lie within well defined decision boundaries. For example, time series of default mode network regions, though having lower participation during cognitive tasks, when cross-correlated with the average time series of all other brain regions, demonstrated that

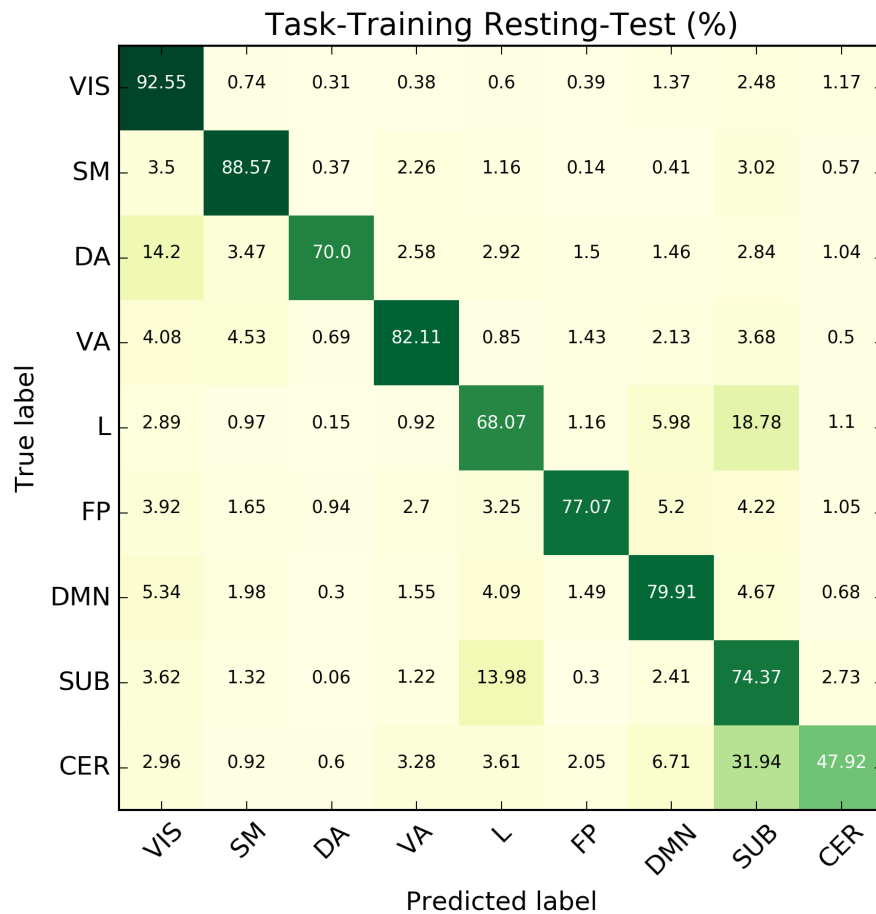

Figure 4: Confusion matrix for the best classification problem, which in this case corresponds to a neural network with one hidden layer with 500 units, using task-based fMRI data as training set and resting-state fMRI data as testing set.

their integration and participation make them differentiable (in the end, Pearson correlation is unaltered by a change of scale). In contrast, the limbic system showed the worst performance, with limbic regions often miscategorised as belonging to the subcortical network. This was caused by some areas of both networks showing a similar pattern of activity, forcing the classifier to lean towards the subcortical network, the majority class over the limbic group.

The connection of task-evoked experiments with resting-state becomes even clearer if one looks at the results presented in figures 4, 5 and 6, where VIS and SM networks in particular (which mainly take part in the MOTOR task), are recovered exclusively from resting data with great accuracy. This apparent correspondence between both modalities is being thoroughly investigated. In a seminal work, Smith *et al.* [Smith *et al.*, 2009] demonstrated the existence of a high similarity between the ICA-analysis results extracted independently from a resting-state fMRI dataset consisting of 36 healthy subjects and activation maps from BrainMap database of functional imaging studies across nearly 30,000 human subjects. This suggests that the brain at rest is continuously active so as to be a composition of all the inherent possible tasks, such that a model trained based on a specific task will emerge naturally as one of its components when tested on resting state. On the other hand, in [Finn *et al.*, 2015] an exhaustive study of this was carried out showing that the same networks that mostly discriminate individuals were also most predictive of cognitive behaviour. In [Tavor *et al.*, 2016] prediction of activation maps by resting-state fMRI were overlapped with maps used to fit a wide range of task-based models and demonstrated that individual differences in brain response are inherently linked to the brain itself rather than to a specific manifestation given a certain task. Nonetheless, our work rather embraces the spirit of [Mitchell *et al.*, 2013] in terms of the methodology used. We have aimed at building successfully the decision surfaces that separate

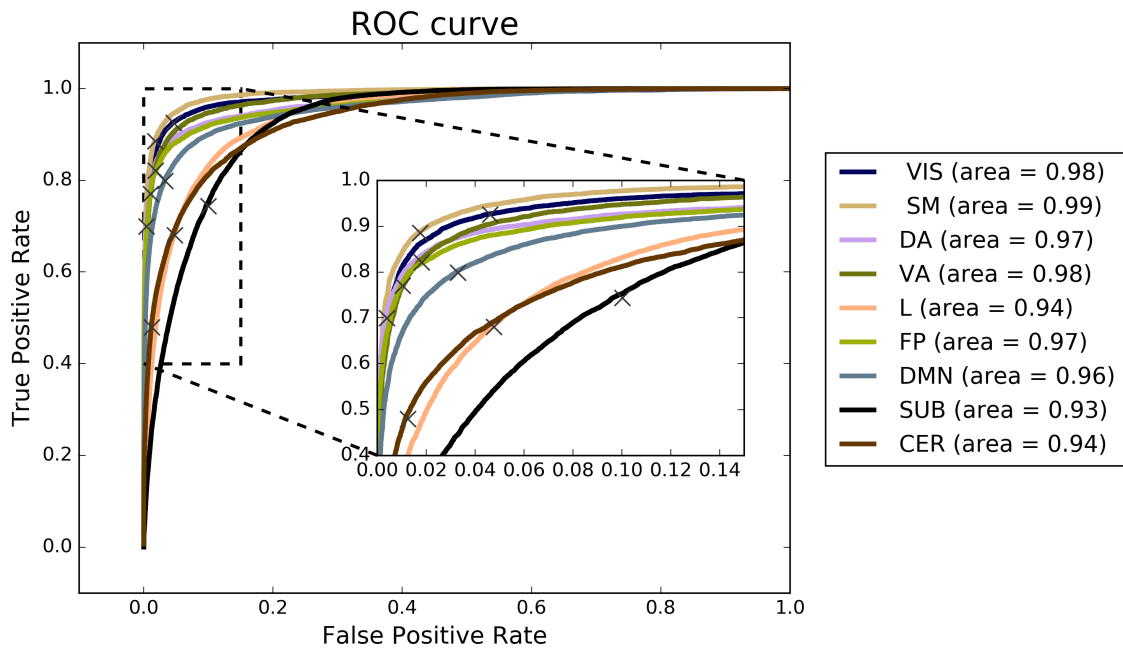

Figure 5: ROC curves for each class separately. The areas under these curves can be found in the legend located on the right side.

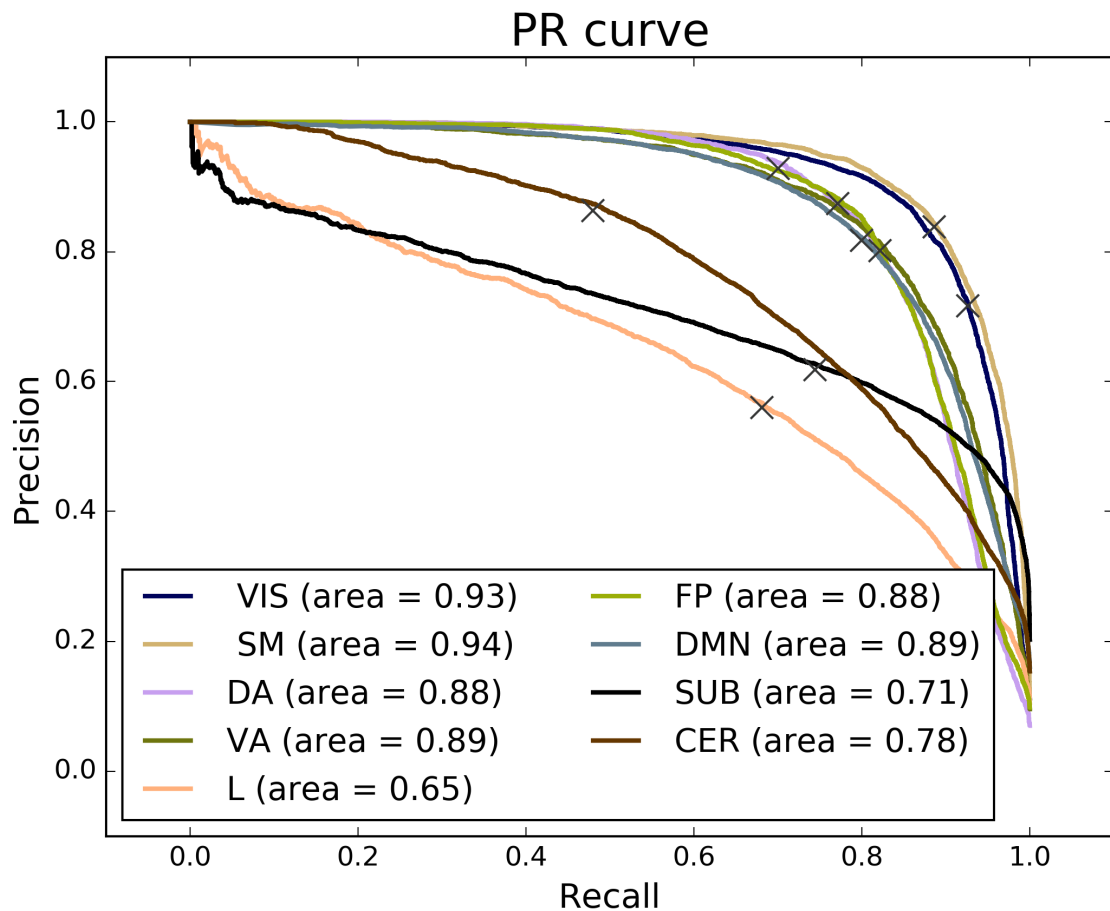

Figure 6: PR curves for each class separately. The areas under these curves can be found in the legend located on the right side.

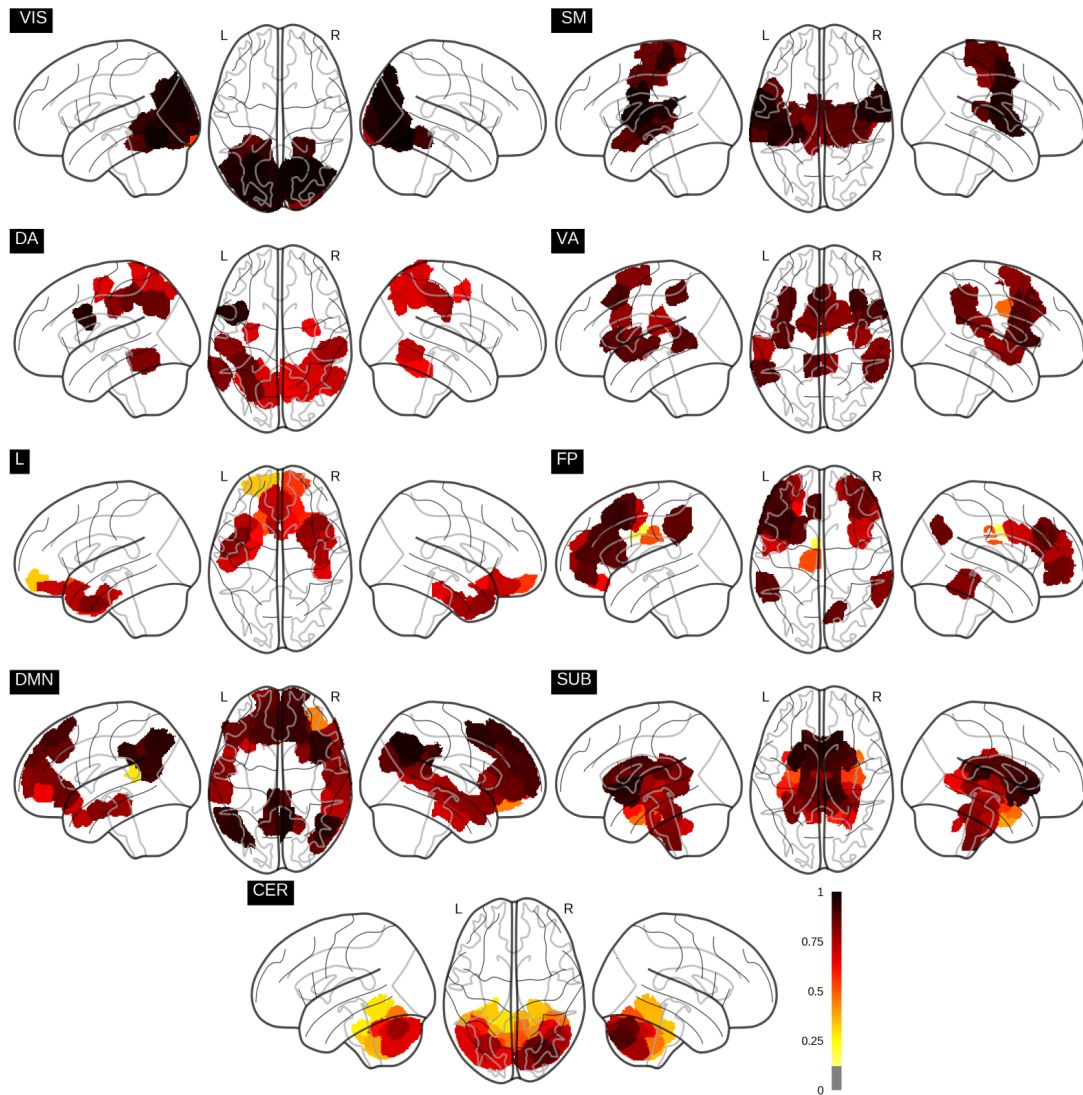

Figure 7: Classification accuracy of each node across all 282 subjects.

the different ICNs by performing an exhaustive machine learning algorithm search in a large cohort of subjects. It is also worthwhile to stress that individual task-rest correspondence and between-subject reproducibility of patterns are different and possibly orthogonal problems, and that the cognitive relevance of these networks is mainly expressed on the subject-specific level [Kong et al., 2018].

Regarding the results obtained, one might be tempted to take the outcome of the ROC curves in Figure 5 as outstanding, where all the classes exhibit a ROC area greater than 0.9. However, as noted in [Davis and Goadrich, 2006], plotting ROC curves separately for each label might not be appropriate in multi-class settings where negative examples far exceed the number of positive instances. In this case  $FP \ll TN$ , so changes in the number of false positives hardly affect the False Positive Rate, which continues to hold small and therefore the area obtained is usually large. As a consequence, it is better to use Precision-Recall curves, which concentrate only on the positive class and therefore do not suffer from these issues. As it can be seen in Figure 5, the areas found go more in concordance with the findings discussed previously, where the VIS and SM networks seem to be identified most accurately. In addition, we can see two interesting features from carefully inspecting these curves. Firstly, both VIS and DA actual set-ups, denoted as gray crosses, lie in a non-optimal location on their respective curve. If we look at the results for the VIS network in the diagonal of Figure 4, which is nothing less than the Recall measure, we therefore notice

that this is accompanied by a loss of precision. Secondly, even though CER network seemed to behave extremely poor when testing the model on resting fMRI, we can see that this is an effect of the threshold used. In fact, when we vary this quantity, we can see that this group performs much better than the Limbic and Subcortical systems. Finally, it is also remarkable how well areas in DMN can be predicted from a model that was trained exclusively on a task-based, during which its activation would not be expected. One possible explanation might be that the functional connectivity within this network has a precise mapping with its structural connectivity [Greicius et al., 2009] and therefore, the integration in DMN might preserve across different tasks.

## 5 Conclusion

Successfully delineating intrinsic connectivity networks of the brain is of key importance to fully understand its behaviour and the relations that take place during their evoked activity. Multivariate methods in machine learning turn out to be promising techniques in successfully identifying ICN networks from both task and resting-state fMRI data. As usual, the selection of the optimal algorithm is a crucial step. Obviously the optimal algorithm depends on the complexity of the problem. In our case, we have seen that a simple neural network with just one layer works the best. Whether a higher resolution or different parcellation might require to go deeper relies for a future analysis.

As mentioned, the accurate prediction of the different baseline functions of the brain even when the model has been fitted using a different protocol (in our case a visual-tapping task) might be relevant for important future applications in clinical neuroscience. Localization of functions that are questionable due to the incapability of subjects to perform specific tasks could arise easily in this proposed scenario and could therefore help clinicians isolate the areas demanding a correct treatment for subject recovery. Moreover, future studies using the strategy followed in this work can address how brain regions in patients who have undergone a surgical operation change their connectivity pattern and therefore specialise in performing new tasks.

## Code

Code for downloading and preprocessing of the data used in this work, and replication of results and plots is available at <https://github.com/jrasero/Predicting-icns>

## Acknowledgment

JR acknowledges financial support from the Minister of Education, Language Policy and Culture (Basque Government) under Doctoral Research Staff Improvement Programme.

## References

- [Beckmann et al., 2005] Beckmann, C. F., DeLuca, M., Devlin, J. T., and Smith, S. M. (2005). Investigations into resting-state connectivity using independent component analysis. *Philosophical Transactions of the Royal Society B: Biological Sciences*, 360(1457):1001–1013.
- [Bellec et al., 2010] Bellec, P., Rosa-Neto, P., Lyttelton, O. C., Benali, H., and Evans, A. C. (2010). Multi-level bootstrap analysis of stable clusters in resting-state fmri. *Neuroimage*, 51(3):1126–39.
- [Biswal et al., 1995] Biswal, B., Yetkin, Z., F., H., M., V., and Hyde, J. S. (1995). Functional connectivity in the motor cortex of resting human brain using echo-planar mri. *Magnetic Resonance in Medicine*, 34(4):537–541.
- [Buckner, 2013] Buckner, R. L. (2013). The cerebellum and cognitive function: 25 years of insight from anatomy and neuroimaging. *Neuron*, 80(3):807–815.
- [Chollet et al., 2015] Chollet, F. et al. (2015). Keras: The python deep learning library.

- [Cordes et al., 2002] Cordes, D., Haughton, V., Carew, J. D., Arfanakis, K., and Maravilla, K. (2002). Hierarchical clustering to measure connectivity in fmri resting-state data. Magnetic Resonance Imaging, 20(4):305–317.
- [Damoiseaux et al., 2006] Damoiseaux, J. S., Rombouts, S. A. R. B., Barkhof, F., Scheltens, P., Stam, C. J., Smith, S. M., and Beckmann, C. F. (2006). Consistent resting-state networks across healthy subjects. Proceedings of the National Academy of Sciences of the United States of America, 103(37):13848–13853.
- [Davis and Goadrich, 2006] Davis, J. and Goadrich, M. (2006). The relationship between precision-recall and roc curves. In Proceedings of the 23rd International Conference on Machine Learning, pages 233–240.
- [et al., 2011] et al., P. (2011). Scikit-learn: Machine learning in python. Journal of Machine Learning Research, (12).
- [Finn et al., 2015] Finn, E. S., Shen, X., Scheinost, D., et al. (2015). Functional connectome fingerprinting: Identifying individuals based on patterns of brain connectivity. Nature neuroscience, 18(11):1664–1671.
- [Fox et al., 2006] Fox, M. D., Corbetta, M., Snyder, A. Z., Vincent, J. L., and Raichle, M. E. (2006). Spontaneous neuronal activity distinguishes human dorsal and ventral attention systems. Proceedings of the National Academy of Sciences of the United States of America, 103(26):10046–10051.
- [Glasser et al., 2013] Glasser, M. F., Sotiropoulos, S. N., Wilson, J. A., Coalson, T. S., Fischl, B., and Andersson, J. L. f. t. W.-M. H. C. (2013). The minimal preprocessing pipelines for the human connectome project. Neuroimage, 80:105–124.
- [Greicius et al., 2009] Greicius, M. D., Supekar, K., Menon, V., and Dougherty, R. F. (2009). Resting-state functional connectivity reflects structural connectivity in the default mode network. Cerebral Cortex (New York, NY), 19(1):72–78.
- [Gusnard and Raichle, 2001] Gusnard, D. A. and Raichle, M. E. (2001). Searching for a baseline: Functional imaging and the resting human brain. Nat Rev Neurosci, 2(10):685–694.
- [Hacker et al., 2013] Hacker, C. D., Laumann, T. O., Szrama, N. P., Baldassarre, A., Snyder, A. Z., Leuthardt, E. C., and Corbetta, M. (2013). Resting state network estimation in individual subjects. Neuroimage, 15:616–633.
- [Jones et al., 2017] Jones, P., O., V., L., N., Adcock, J. E., Stacey, R., and Jbabdi, S. (2017). Resting connectivity predicts task activation in pre-surgical populations. NeuroImage: Clinical, 13:378–385.
- [Kong et al., 2018] Kong, R., Li, J., Sun, N., Sabuncu, M. R., Liu, H., Schaefer, A., Zuo, X.-N., Holmes, A., Eickhoff, S. B., and Yeo, B. T. (2018). Spatial topography of individual-specific cortical networks predicts human cognition, personality and emotion. bioRxiv.
- [Lee et al., 2012] Lee, M. H., Hacker, C. D., Snyder, A. Z., Corbetta, M., Zhang, D., Leuthardt, E. C., and Shimony, J. S. (2012). Clustering of resting state networks. PLoS ONE, 7:1–12.
- [Lee et al., 2016] Lee, M. H., Miller-Thomas, M. M., Benziger, T. L., Marcus, D. S., Hacker, C. D., Leuthardt, E. C., and Shimony, J. S. (2016). Clinical resting-state fmri in the preoperative setting. Topics in Magnetic Resonance Imaging, 25:11–17.
- [Mitchell et al., 2013] Mitchell, T. J., Hacker, C. D., Breshears, J. D., Szrama, N. P., Sharma, M., Bundy, D. T., and Leuthardt, E. C. (2013). A novel data-driven approach to preoperative mapping of functional cortex using resting-state functional magnetic resonance imaging. Neurosurgery, 73(6):969–983.
- [Raichle et al., 2001] Raichle, M. E., MacLeod, A. M., Snyder, A. Z., Powers, W. J., Gusnard, D. A., and Shulman, G. L. (2001). A default mode of brain function. Proceedings of the National Academy of Sciences of the United States of America, 98(2):676–682.

- [Salimi-Khorshidi et al., 2014] Salimi-Khorshidi, G., Douaud, G., Beckmann, C. F., Glasser, M. F., Griffanti, L., and Smith, S. M. (2014). Automatic denoising of functional mri data: Combining independent component analysis and hierarchical fusion of classifiers. *NeuroImage*, 90:449–468.
- [Shen et al., 2013] Shen, X., Tokoglu, F., Papademetris, X., and Constable, R. T. (2013). Group-wise whole-brain parcellation from resting-state fmri data for network node identification. *Neuroimage*, pages 403–415.
- [Smith et al., 2009] Smith, A., M., S., Fox, P. T., Miller, K. L., Glahn, D. C., Fox, P. M., Mackay, C. E., and Beckmann, C. F. (2009). Correspondence of the brain’s functional architecture during activation and rest. *Proceedings of the National Academy of Sciences of the United States of America*, 106(31):13040–13045.
- [Tavor et al., 2016] Tavor, I., Jones, O. P., Mars, R. B., Smith, S. M., Behrens, T. E., and Jbabdi, S. (2016). Task-free mri predicts individual differences in brain activity during task performance. *Science*, 352:216–220.
- [van den Heuvel et al., 2008] van den Heuvel, M., Mandl, R., and Hulshoff Pol, H. (2008). Normalized cut group clustering of resting-state fmri data. *PLOS ONE*, 3(4):1–11.
- [Vincent et al., 2008] Vincent, J. L., Kahn, I., Snyder, A. Z., Raichle, M. E., and Buckner, R. L. (2008). Evidence for a frontoparietal control system revealed by intrinsic functional connectivity. *Journal of Neurophysiology*, 100(6):3328–3342.
- [Yeo et al., 2011] Yeo, T., T., B., Krienen, F. M., Sepulcre, J., Sabuncu, M. R., Lashkari, D., Hollinshead, M., and Buckner, R. L. (2011). The organization of the human cerebral cortex estimated by intrinsic functional connectivity. *Journal of Neurophysiology*, 106(3):1125–1165.
